# Supplementary material
Source: Elsevier journal article supplement (https://www.sciencedirect.com/science/article/pii/S2531043722000708)
Supplement: mmc1 [file S2531043722000708:mmc1.docx]

**Supplementary table 1. Pulmonology Departments invited to participate**

| Centro Hospitalar Barreiro-Montijo  Centro Hospitalar de Entre o Douro e Vouga  Centro Hospitalar de Leiria  Centro Hospitalar de Lisboa Ocidental  Centro Hospitalar de Setúbal (Hosp. São Bernardo)  Centro Hospitalar de Tondela-Viseu  Centro Hospitalar de Trás-Os-Montes e Alto Douro  Centro Hospitalar de Vila Nova de Gaia/Espinho  Centro Hospitalar do Baixo Vouga  Centro Hospitalar do Médio Ave  Centro Hospitalar do Tâmega e Sousa  Centro Hospitalar e Universitário de Coimbra (A and B)  Centro Hospitalar e Universitário do Algarve  Centro Hospitalar Universitário Cova da Beira  Centro Hospitalar Universitário de Lisboa Central  Centro Hospitalar Universitário de São João  Centro Hospitalar Universitário do Porto  Centro Hospitalar Universitário Lisboa Norte  Hospital CUF Tejo/CUF Descobertas  Fundação Champalimaud  Hospital Beatriz Ângelo  Hospital da Figueira da Foz  Hospital da Senhora da Oliveira Guimarães  Hospital de Braga  Hospital de Cascais  Hospital de Santa Maria Maior  Hospital de Vila Franca de Xira  Hospital Distrital de Santarém  Hospital do Espírito Santo de Évora  Hospital Garcia de Orta  Hospital Prof. Doutor Fernando Fonseca  Instituto Português de Oncologia de Coimbra Francisco Gentil  Instituto Português de Oncologia de Lisboa Francisco Gentil  Instituto Português de Oncologia do Porto Francisco Gentil  Unidade Local de Saúde da Guarda  Unidade Local de Saúde de Castelo Branco  Unidade Local de Saúde de Matosinhos  Centro Hospitalar do Médio Tejo  Centro Hospitalar do Oeste  Unidade Local de Saúde do Alto Minho |
| --- |
